# Supplementary material for: Detection of carbon dioxide and hydrogen peroxide on the stratified surface of Charon with JWST
Source: PubMed Central journal article supplement — Nat Commun. 2024 Oct 1;15:8247. doi: 10.1038/s41467-024-51826-4 (PMC11448499; doi:10.1038/s41467-024-51826-4), 2024-10-01
Supplement: 41467_2024_51826_MOESM1_ESM.pdf [file 41467_2024_51826_MOESM1_ESM.pdf]

# Detection of carbon dioxide and hydrogen peroxide on the stratified surface of Charon with JWST

Silvia Protopapa<sup>1\*</sup>, Ujjwal Raut<sup>2,3</sup>, Ian Wong<sup>4,5,6</sup>,  
John Stansberry<sup>6,7,8</sup>, Geronimo L. Villanueva<sup>4</sup>, Jason Cook<sup>9</sup>,  
Bryan Holler<sup>6</sup>, William M. Grundy<sup>7,8</sup>, Rosario Brunetto<sup>10</sup>,  
Richard J. Cartwright<sup>11</sup>, Bereket Mamo<sup>3,2</sup>, Joshua P. Emery<sup>8</sup>,  
Alex H. Parker<sup>12</sup>, Aurelie Guilbert-Lepoutre<sup>13</sup>,  
Noemi Pinilla-Alonso<sup>14</sup>, Stefanie N. Milam<sup>4</sup>, Heidi B. Hammel<sup>15</sup>

<sup>1\*</sup>Southwest Research Institute, Boulder, CO, USA.

<sup>2</sup>Southwest Research Institute, San Antonio, TX, USA.

<sup>3</sup>University of Texas at San Antonio, San Antonio, TX, USA.

<sup>4</sup>NASA Goddard Space Flight Center, Greenbelt, MD, USA.

<sup>5</sup>American University, Washington, DC, USA.

<sup>6</sup>Space Telescope Science Institute, Baltimore, MD, USA.

<sup>7</sup>Lowell Observatory, Flagstaff, AZ, USA.

<sup>8</sup>Northern Arizona University, Flagstaff, AZ, USA.

<sup>9</sup>Pinhead Institute, Telluride, CO, USA.

<sup>10</sup>Université Paris-Saclay, CNRS, Institut d'Astrophysique Spatiale,  
Orsay, France.

<sup>11</sup>Johns Hopkins University Applied Physics Laboratory, Laurel, MD,  
USA.

<sup>12</sup>SETI Institute, Mountain View, CA, USA.

<sup>13</sup>LGL-TPE, UMR 5276 CNRS, University Lyon 1, ENS, Villeurbanne,  
France.

<sup>14</sup>Florida Space Institute, University of Central Florida, Orlando, FL,  
USA.

<sup>15</sup>Association of Universities for Research in Astronomy, Washington,  
DC, USA.

\*Corresponding author(s). E-mail(s): [silvia.protopapa@swri.org](mailto:silvia.protopapa@swri.org);

This file includes Supplementary Table 1 and Supplementary Figures 1 to 5.

**Supplementary Table 1** Details of the JWST/NIRSpec Observations of Charon (Program ID #1191)

| Filename <sup>1</sup>     | Date <sup>2</sup> | Time <sup>3</sup> | Obs. # | Grating | Filter | Exp. Time <sup>4</sup> |
|---------------------------|-------------------|-------------------|--------|---------|--------|------------------------|
| jw01191004001_03101_00001 | 2022-09-24        | 17:35:06.553      | 004    | G140H   | F100LP | 204.244                |
| jw01191004001_03101_00002 | 2022-09-24        | 17:41:49.112      | 004    | G140H   | F100LP | 204.244                |
| jw01191004001_03103_00001 | 2022-09-24        | 17:50:48.902      | 004    | G235H   | F170LP | 277.189                |
| jw01191004001_03103_00002 | 2022-09-24        | 17:58:41.734      | 004    | G235H   | F170LP | 277.189                |
| jw01191004001_03105_00001 | 2022-09-24        | 18:08:48.432      | 004    | G395H   | F290LP | 554.378                |
| jw01191004001_03105_00002 | 2022-09-24        | 18:21:18.447      | 004    | G395H   | F290LP | 554.378                |
| jw01191005001_03101_00001 | 2023-04-18        | 01:29:16.432      | 005    | G140H   | F100LP | 204.244                |
| jw01191005001_03101_00002 | 2023-04-18        | 01:35:51.119      | 005    | G140H   | F100LP | 204.244                |
| jw01191005001_03103_00001 | 2023-04-18        | 01:45:04.734      | 005    | G235H   | F170LP | 277.189                |
| jw01191005001_03103_00002 | 2023-04-18        | 01:53:06.205      | 005    | G235H   | F170LP | 277.189                |
| jw01191005001_03105_00001 | 2023-04-18        | 02:03:04.343      | 005    | G395H   | F290LP | 554.378                |
| jw01191005001_03105_00002 | 2023-04-18        | 02:15:42.999      | 005    | G395H   | F290LP | 554.378                |
| jw01191103001_03101_00001 | 2023-04-21        | 07:00:42.847      | 103    | G140H   | F100LP | 204.244                |
| jw01191103001_03101_00002 | 2023-04-21        | 07:07:23.103      | 103    | G140H   | F100LP | 204.244                |
| jw01191103001_03103_00001 | 2023-04-21        | 07:16:31.149      | 103    | G235H   | F170LP | 277.189                |
| jw01191103001_03103_00002 | 2023-04-21        | 07:24:24.365      | 103    | G235H   | F170LP | 277.189                |
| jw01191103001_03105_00001 | 2023-04-21        | 07:34:30.759      | 103    | G395H   | F290LP | 554.378                |
| jw01191103001_03105_00002 | 2023-04-21        | 07:47:01.158      | 103    | G395H   | F290LP | 554.378                |
| jw01191106001_03101_00001 | 2023-04-19        | 04:59:16.507      | 106    | G140H   | F100LP | 204.244                |
| jw01191106001_03101_00002 | 2023-04-19        | 05:05:51.195      | 106    | G140H   | F100LP | 204.244                |
| jw01191106001_03103_00001 | 2023-04-19        | 05:15:04.809      | 106    | G235H   | F170LP | 277.189                |
| jw01191106001_03103_00002 | 2023-04-19        | 05:23:06.281      | 106    | G235H   | F170LP | 277.189                |
| jw01191106001_03105_00001 | 2023-04-19        | 05:33:04.419      | 106    | G395H   | F290LP | 554.378                |
| jw01191106001_03105_00002 | 2023-04-19        | 05:45:43.074      | 106    | G395H   | F290LP | 554.378                |

<sup>1</sup>Data are publicly available from the Space Telescope Science Institute's Mikulski Archive for Space Telescopes: <https://mast.stsci.edu/>. Details for JWST program #1191 are available at <https://www.stsci.edu/jwst/phase2-public/1191.pdf>.

<sup>2</sup>Date format: (yyyy-mm-dd); UTC date at the start of exposure.

<sup>3</sup>Time format: (hh:mm:ss.sss); UTC time at the start of exposure.

<sup>4</sup>Exposure Time: (s); Effective exposure time.

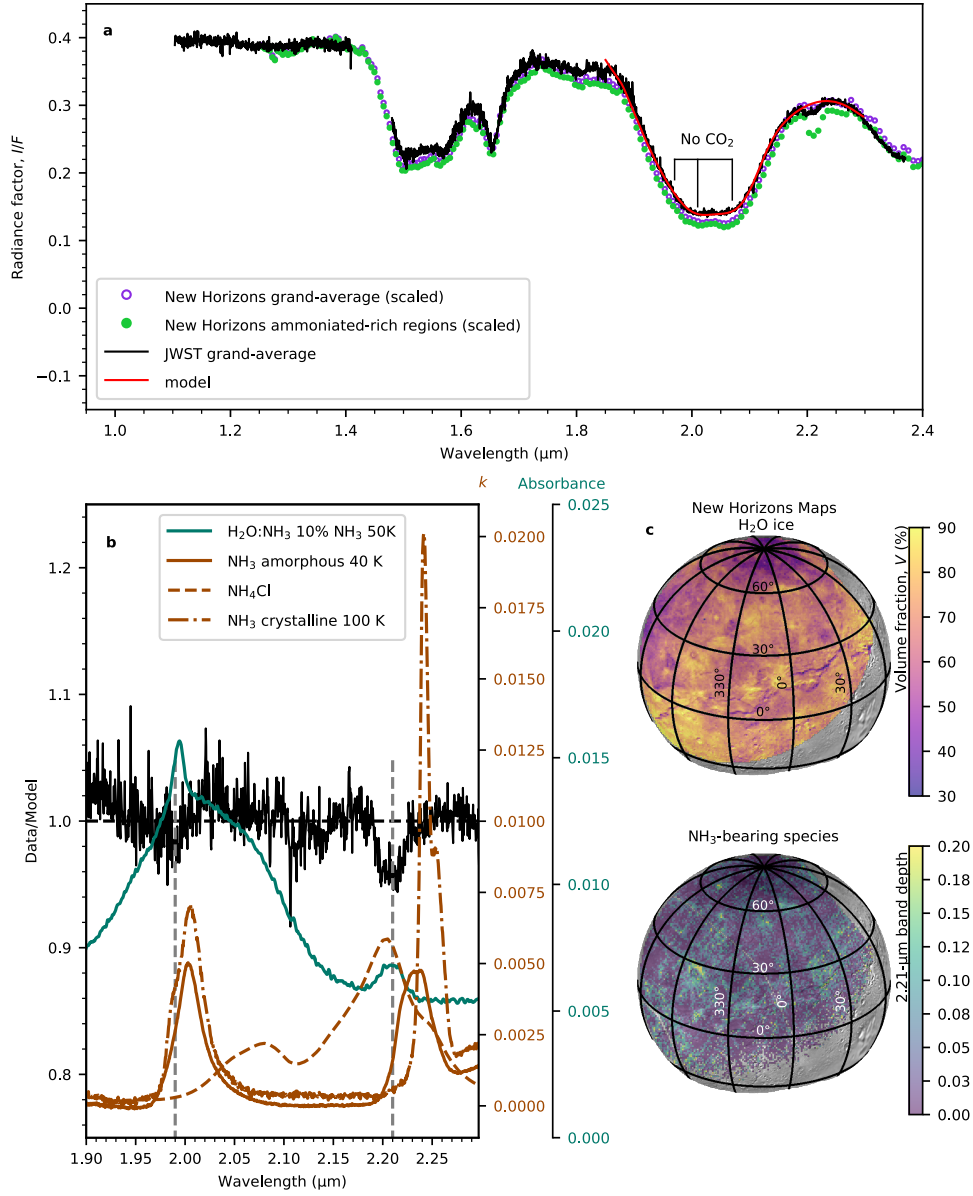

**Supplementary Fig. 1 Comparing JWST and New Horizons spectra of Charon with a focus on the 2.21- $\mu\text{m}$  feature.** **a** The JWST/NIRSpec grand-average spectrum of Charon (black line) is plotted alongside the best fit model (red line) for the 2.0- $\mu\text{m}$  region. For comparison, the spectra from the New Horizons/LEISA's C.LEISA\_HIRES scan of Charon, normalized to the JWST data at 1.34  $\mu\text{m}$ , are shown [8]. Specifically, the magenta dots illustrate the disk-averaged spectrum of Charon, while the green dots display the spectrum from regions that showcase the most pronounced 2.21- $\mu\text{m}$  absorption band (green to yellow regions in the 2.21- $\mu\text{m}$  band depth map at the bottom of panel c). **b** Displayed here are the residuals (data/model) within the 2.2- $\mu\text{m}$  spectral range. For context, laboratory spectra — both in terms of the imaginary part of the refractive index  $k$  (brown lines) and absorbance (teal line) (where a peak in  $k$  or absorbance signifies an absorption band) — of amorphous and crystalline  $\text{NH}_3$  [80, 81], a  $\text{H}_2\text{O}$ - $\text{NH}_3$  ice mixture containing 10%  $\text{NH}_3$  [40], and ammonium chloride ( $\text{NH}_4\text{Cl}$ ) [82] are presented. Considering the position and width of the 2.21- and 1.99- $\mu\text{m}$  absorption bands, marked by gray dashed lines, we deduce that  $\text{NH}_3$  diluted in  $\text{H}_2\text{O}$  is the best candidate for the nature of the  $\text{NH}_3$ -bearing species on Charon. **c** The top and bottom panels, show the volume fraction of crystalline  $\text{H}_2\text{O}$  ice and the 2.21- $\mu\text{m}$  band depth map of Charon. Both are derived from a pixel-by-pixel Hapke radiative transfer model analysis of the New Horizons C.LEISA\_HIRES scan [8]. Source data are provided as a Source Data file.

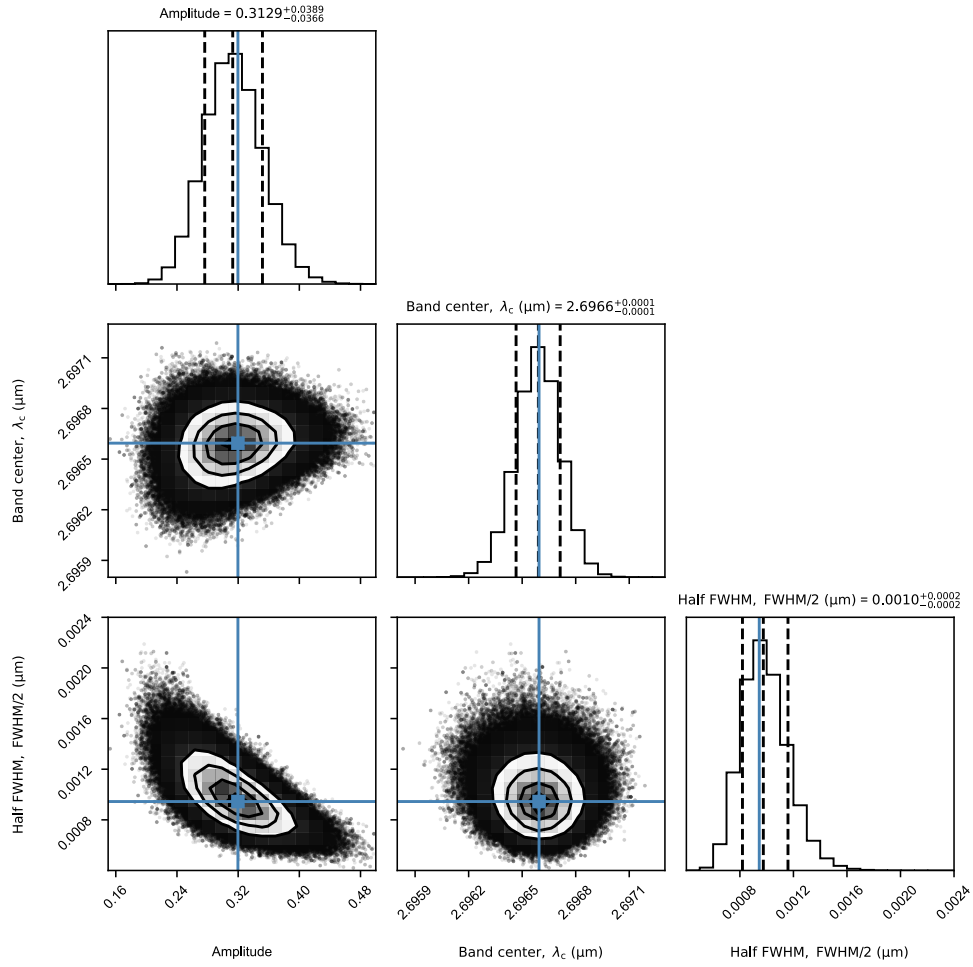

**Supplementary Fig. 2** Markov Chain Monte Carlo (MCMC) parameter exploration of the Lorentzian fit to the 2.7- $\mu\text{m}$   $\nu_1 + \nu_3$   $\text{CO}_2$  band. This corner plot visualizes the 1D and 2D posterior distributions resulting from the MCMC fitting of the 2.7- $\mu\text{m}$   $\text{CO}_2$  absorption band using a Lorentzian model. The explored parameters include amplitude, band center  $\lambda_c$ , and half of the full width at half maximum (FWHM). The contours represent the 1- $\sigma$ , 2- $\sigma$ , and 3- $\sigma$  confidence intervals, derived from the quantile levels of 16%, 50%, and 84%. The MCMC simulation, conducted using the `emcee` Python library, used 1000 walkers and a chain length of 3000 steps. When generating the posterior distributions, the first 10% of the chains was discarded. The blue markers represent the best-fit parameters derived using a Levenberg-Marquardt minimization process prior to the MCMC run. These parameters are shown in the spectral fit in Figure 2c.

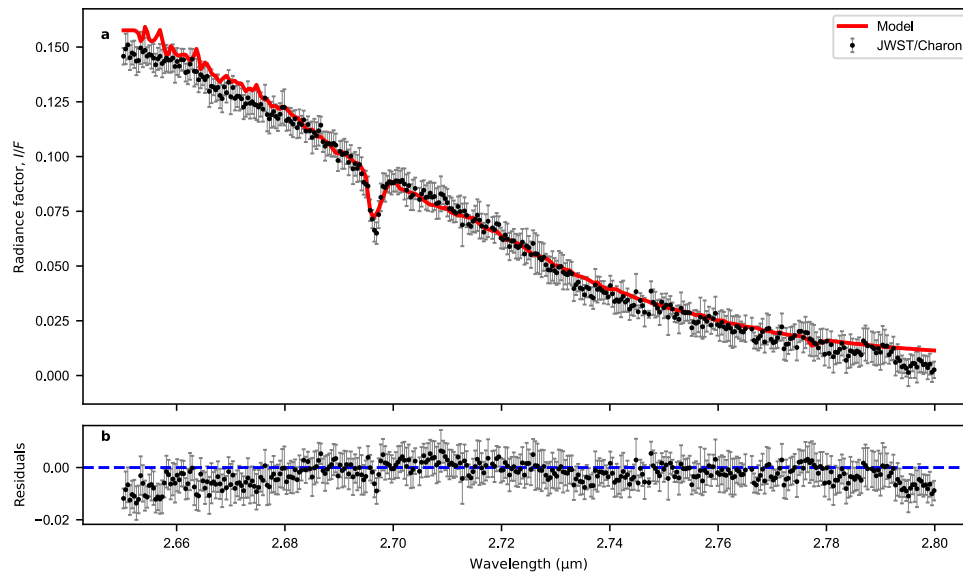

**Supplementary Fig. 3 CO<sub>2</sub> abundance as derived from the 2.7- $\mu\text{m}$   $\nu_1 + \nu_3$  absorption band.** **a** The grand-average spectrum of Charon, obtained by JWST/NIRSpec (represented by black points) along with the corresponding 1- $\sigma$  errors (gray bars), is plotted against the best-fit model (red line) for the 2.7- $\mu\text{m}$  region. **b** The residuals between the data and the best fit are shown. The model consists of an areal mixture of 80% crystalline H<sub>2</sub>O ice, 18% amorphous H<sub>2</sub>O ice, and 2% crystalline CO<sub>2</sub>. Source data are provided as a Source Data file.

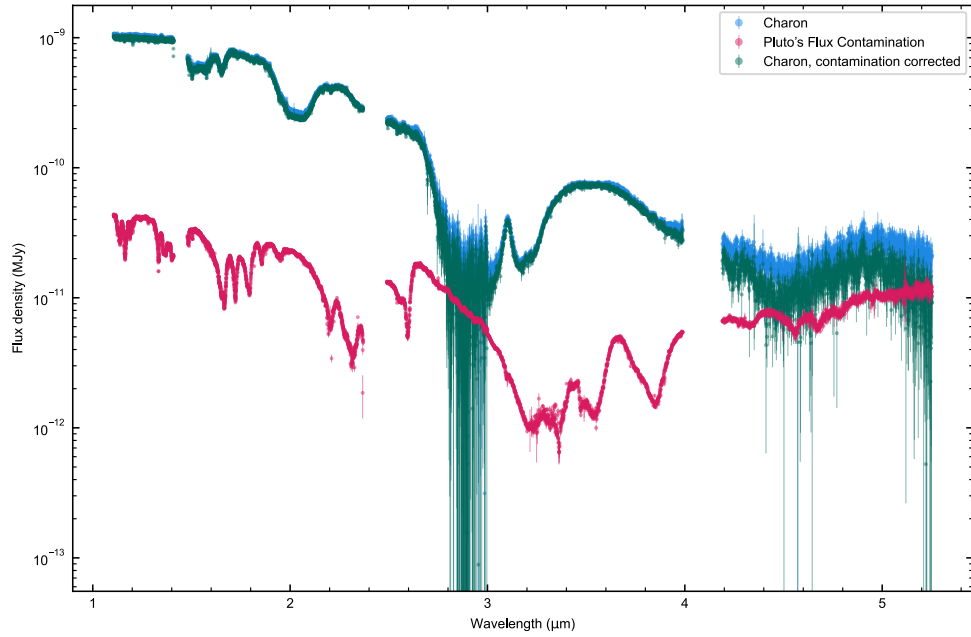

**Supplementary Fig. 4 Charon’s spectrum before and after correcting for Pluto’s flux contamination.** The JWST spectrum of Charon corresponding to Observation #103 before (blue) and after (green) correction for Pluto’s flux contamination (red) is shown, with  $1\text{-}\sigma$  errors indicated for each spectrum. The comparison highlights that Pluto and Charon do not share the same spectral features. On average, Pluto’s flux contamination contributes 5% across the spectral range. However, in the specific wavelength ranges between 2.8 and 3  $\mu\text{m}$ , and between 4.19 and 5.3  $\mu\text{m}$ , the contamination increases significantly to 47% and 38%, respectively. Source data are provided as a Source Data file.

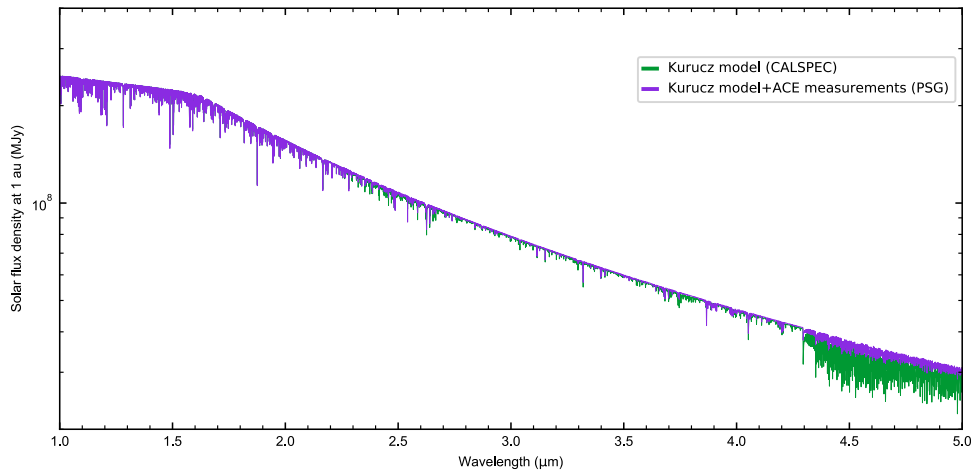

**Supplementary Fig. 5 Comparison of measured and synthetic solar spectra.** The solar spectrum at 1 au, as modeled by Kurucz (represented by the green line and sourced from the CALSPEC database), is compared with the solar spectrum implemented by the Planetary Spectrum Generator (PSG). The latter combines the Kurucz model at short wavelengths up to 2.0  $\mu\text{m}$  with measurements from the ACE instrument onboard SCISAT-1 beyond 2  $\mu\text{m}$ . Both spectra are shown at a resolving power of 5000. As expected, there is perfect agreement between the two spectra at shorter wavelengths. However, the CALSPEC model clearly does not reproduce the observed spectrum beyond 4.3  $\mu\text{m}$ . Source data are provided as a Source Data file.
